# Supplementary material for: Fucoidan enhances the therapeutic potential of arsenic trioxide and all-trans retinoic acid in acute promyelocytic leukemia, in vitro and in vivo
Source: PubMed Central journal article supplement (PMC5216779; doi:10.18632/oncotarget.10016), 2016-06-14
Supplement: oncotarget-07-46028-s001.pdf [file oncotarget-07-46028-s001.pdf]

**Fucoidan enhances the therapeutic potential of arsenic trioxide and all-trans retinoic acid in acute promyelocytic leukemia, *in vitro* and *in vivo***

**SUPPLEMENTARY TABLE**

**Supplementary Table S1: Tumor volumes (mm<sup>3</sup>).**

**See Supplementary File 1**
